# Supplementary material for: Associations Between Anticholinergic Medication Exposure and Adverse Health Outcomes in Older People with Frailty: A Systematic Review and Meta-analysis
Source: PubMed Central journal article supplement — Drugs Real World Outcomes. 2021 Jun 23;8(4):431–58. doi: 10.1007/s40801-021-00256-5 (PMC8605959; doi:10.1007/s40801-021-00256-5), 2021-06-23
Supplement: 40801_2021_256_MOESM1_ESM.pdf [file 40801_2021_256_MOESM1_ESM.pdf]

# Associations between anticholinergic medication exposure and adverse health outcomes in older people with frailty: A systematic review and meta-analysis

## *Drugs – Real World Outcomes*

### Supplementary information file: Appendices

David Mehdizadeh <sup>1,8,9,10</sup>, Matthew Hale <sup>5,6</sup>, Oliver Todd <sup>5</sup>, Hadar Zaman <sup>1,8,9,10</sup>, Iuri Marques <sup>8,10</sup>, Duncan Petty <sup>1,8,10</sup>, David P. Alldred <sup>4,8,9,10</sup>, Owen Johnson <sup>3,8,9,10</sup>, Muhammad Faisal <sup>2,8,10</sup>, Peter Gardner <sup>1,8,10</sup>, Andrew Clegg <sup>5,7,8,9,10</sup>

*1 School of Pharmacy and Medical Sciences, University of Bradford, Bradford, UK*

*2 Faculty of Health Studies, University of Bradford, Bradford, UK*

*3 School of Computing, University of Leeds, Leeds, UK*

*4 School of Healthcare, University of Leeds, Leeds, UK*

*5 Academic Unit for Ageing and Stroke Research, University of Leeds, Bradford Teaching Hospitals NHS Foundation Trust, Bradford, UK*

*6 Department of Geriatrics, Bradford Teaching Hospitals NHS Foundation Trust, Bradford BD9 6RJ, UK*

*7 NIHR Applied Research Collaboration Yorkshire & Humber (NIHR ARC YH), Bradford, UK*

*8 NIHR Yorkshire and Humber Patient Safety Translational Research Centre (YHPSTRC), Bradford, UK*

*9 Health Data Research UK North (HDRUK North)*

*10 Wolfson Centre for Applied Health Research, Bradford, UK*

|                                                                                |    |
|--------------------------------------------------------------------------------|----|
| Appendix 1: PRISMA checklist                                                   | 2  |
| Appendix 2: Search strategy for each database                                  | 5  |
| Appendix 3: Screening flowchart for title/abstracts and full-texts             | 26 |
| Appendix 4: Reaching judgement of overall risk of bias using the ROBINS-I tool | 27 |
| Appendix 5: Summary of reasons for excluding studies at full-text review stage | 28 |
| Appendix 6: Results of the meta-analysis                                       | 32 |
| References                                                                     | 33 |

## Appendix 1: PRISMA checklist

| Section/topic             | #  | Checklist item                                                                                                                                                                                                                                                                                              | Reported on page #                         |
|---------------------------|----|-------------------------------------------------------------------------------------------------------------------------------------------------------------------------------------------------------------------------------------------------------------------------------------------------------------|--------------------------------------------|
| <b>TITLE</b>              |    |                                                                                                                                                                                                                                                                                                             |                                            |
| Title                     | 1  | Identify the report as a systematic review, meta-analysis, or both.                                                                                                                                                                                                                                         | 1                                          |
| <b>ABSTRACT</b>           |    |                                                                                                                                                                                                                                                                                                             |                                            |
| Structured summary        | 2  | Provide a structured summary including, as applicable: background; objectives; data sources; study eligibility criteria, participants, and interventions; study appraisal and synthesis methods; results; limitations; conclusions and implications of key findings; systematic review registration number. | 2                                          |
| <b>INTRODUCTION</b>       |    |                                                                                                                                                                                                                                                                                                             |                                            |
| Rationale                 | 3  | Describe the rationale for the review in the context of what is already known.                                                                                                                                                                                                                              | 4                                          |
| Objectives                | 4  | Provide an explicit statement of questions being addressed with reference to participants, interventions, comparisons, outcomes, and study design (PICOS).                                                                                                                                                  | 4                                          |
| <b>METHODS</b>            |    |                                                                                                                                                                                                                                                                                                             |                                            |
| Protocol and registration | 5  | Indicate if a review protocol exists, if and where it can be accessed (e.g., Web address), and, if available, provide registration information including registration number.                                                                                                                               | 4                                          |
| Eligibility criteria      | 6  | Specify study characteristics (e.g., PICOS, length of follow-up) and report characteristics (e.g., years considered, language, publication status) used as criteria for eligibility, giving rationale.                                                                                                      | 4-5                                        |
| Information sources       | 7  | Describe all information sources (e.g., databases with dates of coverage, contact with study authors to identify additional studies) in the search and date last searched.                                                                                                                                  | 5                                          |
| Search                    | 8  | Present full electronic search strategy for at least one database, including any limits used, such that it could be repeated.                                                                                                                                                                               | 5 (+Appendix 2 in supplementary info file) |
| Study selection           | 9  | State the process for selecting studies (i.e., screening, eligibility, included in systematic review, and, if applicable, included in the meta-analysis).                                                                                                                                                   | 5                                          |
| Data collection process   | 10 | Describe method of data extraction from reports (e.g., piloted forms, independently, in duplicate) and any processes for obtaining and confirming data from investigators.                                                                                                                                  | 5-6                                        |

|                                    |    |                                                                                                                                                                                                                        |     |
|------------------------------------|----|------------------------------------------------------------------------------------------------------------------------------------------------------------------------------------------------------------------------|-----|
| Data items                         | 11 | List and define all variables for which data were sought (e.g., PICOS, funding sources) and any assumptions and simplifications made.                                                                                  | 4-5 |
| Risk of bias in individual studies | 12 | Describe methods used for assessing risk of bias of individual studies (including specification of whether this was done at the study or outcome level), and how this information is to be used in any data synthesis. | 6   |
| Summary measures                   | 13 | State the principal summary measures (e.g., risk ratio, difference in means).                                                                                                                                          | 5   |
| Synthesis of results               | 14 | Describe the methods of handling data and combining results of studies, if done, including measures of consistency (e.g., $I^2$ ) for each meta-analysis.                                                              | 6   |

| Section/topic                 | #  | Checklist item                                                                                                                                                                                           | Reported on page #                    |
|-------------------------------|----|----------------------------------------------------------------------------------------------------------------------------------------------------------------------------------------------------------|---------------------------------------|
| Risk of bias across studies   | 15 | Specify any assessment of risk of bias that may affect the cumulative evidence (e.g., publication bias, selective reporting within studies).                                                             | N/A                                   |
| Additional analyses           | 16 | Describe methods of additional analyses (e.g., sensitivity or subgroup analyses, meta-regression), if done, indicating which were pre-specified.                                                         | N/A                                   |
| <b>RESULTS</b>                |    |                                                                                                                                                                                                          |                                       |
| Study selection               | 17 | Give numbers of studies screened, assessed for eligibility, and included in the review, with reasons for exclusions at each stage, ideally with a flow diagram.                                          | 6 (+Figure 1)                         |
| Study characteristics         | 18 | For each study, present characteristics for which data were extracted (e.g., study size, PICOS, follow-up period) and provide the citations.                                                             | 6-7 (+Table 1)                        |
| Risk of bias within studies   | 19 | Present data on risk of bias of each study and, if available, any outcome level assessment (see item 12).                                                                                                | 11                                    |
| Results of individual studies | 20 | For all outcomes considered (benefits or harms), present, for each study: (a) simple summary data for each intervention group (b) effect estimates and confidence intervals, ideally with a forest plot. | 7-11 (+Table 3 and 4)                 |
| Synthesis of results          | 21 | Present results of each meta-analysis done, including confidence intervals and measures of consistency.                                                                                                  | Appendix 6 in supplementary info file |
| Risk of bias across studies   | 22 | Present results of any assessment of risk of bias across studies (see Item 15).                                                                                                                          | N/A                                   |
| Additional analysis           | 23 | Give results of additional analyses, if done (e.g., sensitivity or subgroup analyses, meta-regression [see Item 16]).                                                                                    | N/A                                   |
| <b>DISCUSSION</b>             |    |                                                                                                                                                                                                          |                                       |

|                     |    |                                                                                                                                                                                      |       |
|---------------------|----|--------------------------------------------------------------------------------------------------------------------------------------------------------------------------------------|-------|
| Summary of evidence | 24 | Summarize the main findings including the strength of evidence for each main outcome; consider their relevance to key groups (e.g., healthcare providers, users, and policy makers). | 11-12 |
| Limitations         | 25 | Discuss limitations at study and outcome level (e.g., risk of bias), and at review-level (e.g., incomplete retrieval of identified research, reporting bias).                        | 13-14 |
| Conclusions         | 26 | Provide a general interpretation of the results in the context of other evidence, and implications for future research.                                                              | 15    |
| <b>FUNDING</b>      |    |                                                                                                                                                                                      |       |
| Funding             | 27 | Describe sources of funding for the systematic review and other support (e.g., supply of data); role of funders for the systematic review.                                           | 3     |

## Appendix 2: Search strategy for each database

### MEDLINE (EBSCO)

Rows combined with “OR” and columns combined with “AND”

| <u>Elderly/frailty domain</u>      | <u>Anticholinergic domain</u>                                                                                                                                                                                                                              | <u>Epidemiological filters domain</u> |
|------------------------------------|------------------------------------------------------------------------------------------------------------------------------------------------------------------------------------------------------------------------------------------------------------|---------------------------------------|
| (MH "Aged+")                       | (MH "Muscarinic Antagonists")                                                                                                                                                                                                                              | (MH "Epidemiologic Studies")          |
| late* life                         | (MH "Anticholinergic Syndrome")                                                                                                                                                                                                                            | (MH "Case-Control Studies+")          |
| (MH "Age Factors+")                | (MH "Cholinergic Antagonists+")                                                                                                                                                                                                                            | (MH "Cohort Studies+")                |
| older adult*                       | anti#choliner*                                                                                                                                                                                                                                             | case control                          |
| elderly                            | anti#muscarinic*                                                                                                                                                                                                                                           | cohort stud*                          |
| (MH "Geriatrics")                  | (anti#choliner*) N5 (drug* or medic* or therap* or regime* or treatment* or preparation* or remed* or pill* or tablet* or prescri* or dose* or dosing*)                                                                                                    | cohort analy*                         |
| geriatric*                         | cholinergic block*                                                                                                                                                                                                                                         | cohort N5 (study or studies)          |
| senior*                            | (cholinergic blocking* or anti#muscarinic* or muscarinic antagonist* or parasympatholytic* or atropinic*) N5 (drug* or medic* or agent* or therap* or regime* or treatment* or preparation* or remed* or pill* or tablet* or prescri* or dose* or dosing*) | follow N5 (study or studies)          |
| pensioner*                         | muscarinic antagonist*                                                                                                                                                                                                                                     | observation* N5 (study or studies)    |
| oap*                               | anticholinergic syndrome*                                                                                                                                                                                                                                  | longitudinal                          |
| (MH "Retirement")                  | cholinergic antagonist*                                                                                                                                                                                                                                    | retrospective                         |
| retired                            | parasympatholytic*                                                                                                                                                                                                                                         | cross sectional                       |
| retiree*                           | muscarinic receptor block*                                                                                                                                                                                                                                 | cross sectional N5 (study or studies) |
| oldest old                         | atropin*                                                                                                                                                                                                                                                   | survey                                |
| deep old age                       | (anti#choliner* or anti#muscarinic*) N5 (burden* or risk* or assess* or scale* or tool* or quantif* or measure* or rating* or load* or accumul* or capacit*)                                                                                               | (MH "Epidemiologic Studies+")         |
| polypathologic*                    | anti#cholinergic cognit* burden                                                                                                                                                                                                                            |                                       |
| (MH "Geriatric Assessment")        | acb                                                                                                                                                                                                                                                        |                                       |
| geriatric assessment               | drug burden index                                                                                                                                                                                                                                          |                                       |
| retirement                         | anticholinergic risk scale                                                                                                                                                                                                                                 |                                       |
| aged                               | ars                                                                                                                                                                                                                                                        |                                       |
| comprehensive geriatric assessment | anticholinergic drug scale*                                                                                                                                                                                                                                |                                       |
| (MH "Frailty")                     | ads                                                                                                                                                                                                                                                        |                                       |
| frail*                             | Sedative N1 (load or burden or accumul*)                                                                                                                                                                                                                   |                                       |
| (MH "Geriatric Psychiatry")        |                                                                                                                                                                                                                                                            |                                       |

|                                                                                                                                                                                                                                                        |  |  |
|--------------------------------------------------------------------------------------------------------------------------------------------------------------------------------------------------------------------------------------------------------|--|--|
| geriatric psychiatry                                                                                                                                                                                                                                   |  |  |
| geriatric psychology                                                                                                                                                                                                                                   |  |  |
| geriatric psychopharmacology                                                                                                                                                                                                                           |  |  |
| pre-frail*                                                                                                                                                                                                                                             |  |  |
| robust                                                                                                                                                                                                                                                 |  |  |
| mild* frail*                                                                                                                                                                                                                                           |  |  |
| moderat* frail*                                                                                                                                                                                                                                        |  |  |
| severe* frail*                                                                                                                                                                                                                                         |  |  |
| extreme* frail*                                                                                                                                                                                                                                        |  |  |
| frail* stat*                                                                                                                                                                                                                                           |  |  |
| cognitiv* frail*                                                                                                                                                                                                                                       |  |  |
| physic* frail*                                                                                                                                                                                                                                         |  |  |
| geriatric syndrome*                                                                                                                                                                                                                                    |  |  |
| function* status                                                                                                                                                                                                                                       |  |  |
| (MH "Sarcopenia")                                                                                                                                                                                                                                      |  |  |
| sarcop#eni*                                                                                                                                                                                                                                            |  |  |
| cumulative deficit*                                                                                                                                                                                                                                    |  |  |
| phenotype model*                                                                                                                                                                                                                                       |  |  |
| (edmonton or fried) N5 (index* or indicator* or score* or scale* or tool* or test* or model* or phenotype* or criteri* or marker* or method* or instrument* or assess* or exam* or evaluat* or measure* or screen* or diagnos* or detect* or identif*) |  |  |
| (MH "Walking Speed")                                                                                                                                                                                                                                   |  |  |
| gait speed*                                                                                                                                                                                                                                            |  |  |
| grip strength                                                                                                                                                                                                                                          |  |  |
| (MH "Hand Strength+")                                                                                                                                                                                                                                  |  |  |
| time* up and go                                                                                                                                                                                                                                        |  |  |
| time* up and go test*                                                                                                                                                                                                                                  |  |  |
| tugt                                                                                                                                                                                                                                                   |  |  |
| gug                                                                                                                                                                                                                                                    |  |  |
| get up and go test*                                                                                                                                                                                                                                    |  |  |
| get up and go                                                                                                                                                                                                                                          |  |  |
| (MH "Activities of Daily Living+")                                                                                                                                                                                                                     |  |  |
| physical N3 function*                                                                                                                                                                                                                                  |  |  |
| multi-morbid*                                                                                                                                                                                                                                          |  |  |
| advanced age*                                                                                                                                                                                                                                          |  |  |
| multi-disease*                                                                                                                                                                                                                                         |  |  |
| (multidisease* or multi-disease* or (multiple N1 (ill* or disease# or condition* or syndrome* or disorder*)))                                                                                                                                          |  |  |

**Symbols:**

MH = Exact subject heading.

(\* ) = Replaces one or more letters

(#) = Matches one optional character.

Near operator (N): **N5** finds the words if they are a maximum of five words apart from one another, regardless of the order in which they appear.

(+) = Explode

**CINAHL (EBSCO)**

**Rows combined with “OR” and columns combined with “AND”**

| <u>Elderly/frailty domain</u> | <u>Anticholinergic domain</u>                                                                                                                                                                                                                              | <u>Epidemiological filters domain</u> |
|-------------------------------|------------------------------------------------------------------------------------------------------------------------------------------------------------------------------------------------------------------------------------------------------------|---------------------------------------|
| (MH "Aged+")                  | (MH "Muscarinic Antagonists")                                                                                                                                                                                                                              | (MH "Epidemiological Research")       |
| late* life                    | anticholinergic syndrome                                                                                                                                                                                                                                   | (MH "Case-Control Studies+")          |
| (MH "Age Factors")            | (MH "Cholinergic Antagonists+")                                                                                                                                                                                                                            | (MH "Prospective studies+")           |
| older adult*                  | anti#choliner*                                                                                                                                                                                                                                             | case control                          |
| elderly                       | anti#muscarinic*                                                                                                                                                                                                                                           | cohort stud*                          |
| (MH "Geriatrics")             | (anti#choliner*) N5 (drug* or medic* or therap* or regime* or treatment* or preparation* or remed* or pill* or tablet* or prescri* or dose* or dosing*)                                                                                                    | cohort analy*                         |
| geriatric*                    | cholinergic block*                                                                                                                                                                                                                                         | cohort N5 (study or studies)          |
| senior*                       | (cholinergic blocking* or anti#muscarinic* or muscarinic antagonist* or parasympatholytic* or atropinic*) N5 (drug* or medic* or agent* or therap* or regime* or treatment* or preparation* or remed* or pill* or tablet* or prescri* or dose* or dosing*) | follow N5 (study or studies)          |
| pensioner*                    | muscarinic antagonist*                                                                                                                                                                                                                                     | observation* N5 (study or studies)    |
| oap*                          | anticholinergic syndrome*                                                                                                                                                                                                                                  | longitudinal                          |
| (MH "Retirement")             | cholinergic antagonist*                                                                                                                                                                                                                                    | retrospective                         |
| retired                       | parasympatholytic*                                                                                                                                                                                                                                         | cross sectional                       |
| retiree*                      | muscarinic receptor block*                                                                                                                                                                                                                                 | cross sectional N5 (study or studies) |
| oldest old                    | atropin*                                                                                                                                                                                                                                                   | survey                                |
| deep old age                  | (anti#choliner* or anti#muscarinic*) N5 (burden* or risk* or assess* or scale* or tool* or quantif* or measure* or rating* or load* or accumulat* or capacit*)                                                                                             | (MH "Epidemiological Research+")      |
| polypathologic*               | anti#cholinergic cognit* burden                                                                                                                                                                                                                            | epidemiological study                 |
| (MH "Geriatric Assessment")   | acb                                                                                                                                                                                                                                                        |                                       |

|                                                                                                                                                                                                |                                            |  |
|------------------------------------------------------------------------------------------------------------------------------------------------------------------------------------------------|--------------------------------------------|--|
| geriatric assessment                                                                                                                                                                           | drug burden index                          |  |
| retirement                                                                                                                                                                                     | anticholinergic risk scale                 |  |
| aged                                                                                                                                                                                           | ars                                        |  |
| comprehensive geriatric assessment                                                                                                                                                             | anticholinergic drug scale*                |  |
| (MH "Frailty Syndrome")                                                                                                                                                                        | ads                                        |  |
| frail*                                                                                                                                                                                         | Sedative N1 (load or burden or accumulat*) |  |
| (MH "Geriatric Psychiatry")                                                                                                                                                                    |                                            |  |
| geriatric psychiatry                                                                                                                                                                           |                                            |  |
| geriatric psychology                                                                                                                                                                           |                                            |  |
| geriatric psychopharmacology                                                                                                                                                                   |                                            |  |
| pre-frail*                                                                                                                                                                                     |                                            |  |
| robust                                                                                                                                                                                         |                                            |  |
| mild* frail*                                                                                                                                                                                   |                                            |  |
| moderat* frail*                                                                                                                                                                                |                                            |  |
| severe* frail*                                                                                                                                                                                 |                                            |  |
| extreme* frail*                                                                                                                                                                                |                                            |  |
| frail* stat*                                                                                                                                                                                   |                                            |  |
| cognitiv* frail*                                                                                                                                                                               |                                            |  |
| physic* frail*                                                                                                                                                                                 |                                            |  |
| geriatric syndrome*                                                                                                                                                                            |                                            |  |
| function* status                                                                                                                                                                               |                                            |  |
| (MH "Sarcopenia")                                                                                                                                                                              |                                            |  |
| sarcop#eni*                                                                                                                                                                                    |                                            |  |
| cumulative deficit*                                                                                                                                                                            |                                            |  |
| phenotype model*                                                                                                                                                                               |                                            |  |
| (edmonton or fried) N5 (index* or indicator* or score* or scale* or tool* or test* or model* or phenotype* or criteri* or marker* or method* or instrument* or assess* or exam* or evaluat* or |                                            |  |



|                                                                                                                        |  |  |
|------------------------------------------------------------------------------------------------------------------------|--|--|
| measure* or screen* or diagnos*<br>or detect* or identif*)                                                             |  |  |
| (MH "Walking Speed")                                                                                                   |  |  |
| gait speed*                                                                                                            |  |  |
| grip strength                                                                                                          |  |  |
| (MH "Grip Strength")                                                                                                   |  |  |
| time* up and go                                                                                                        |  |  |
| time* up and go test*                                                                                                  |  |  |
| tugt                                                                                                                   |  |  |
| gug                                                                                                                    |  |  |
| get up and go test*                                                                                                    |  |  |
| get up and go                                                                                                          |  |  |
| (MH "Activities of Daily<br>Living+")                                                                                  |  |  |
| physical N3 function*                                                                                                  |  |  |
| multi-morbid*                                                                                                          |  |  |
| advanced age*                                                                                                          |  |  |
| multi-disease*                                                                                                         |  |  |
| (multidisease* or multi-disease*<br>or (multiple N1 (ill* or disease# or<br>condition* or syndrome* or<br>disorder*))) |  |  |

**Symbols:**

MH = Exact subject heading.

(\*) = Matches multiple characters.

(#) = Matches one optional character.

Near operator (N): N5 finds the words if they are a maximum of five words apart from one another, regardless of the order in which they appear.

(+) = Explode

## EMBASE

Each term in each domain will be searched with OR, and then the three domains will be searched with AND.

### Elderly/frailty domain (searched with OR)

|                                                                                                                             |        |
|-----------------------------------------------------------------------------------------------------------------------------|--------|
|                                                                                                                             | 26,463 |
| #58<br>multidisease* OR 'multi disease*' OR (multiple NEAR/1<br>(ill* OR disease* OR condition* OR syndrome* OR disorder*)) | 181    |
| #57<br>'multi disease*'                                                                                                     | 23,591 |
| #56<br>'advanced age*'                                                                                                      | 1,104  |
| #55<br>'multi morbid*'                                                                                                      | 61,968 |
| #54<br>physical NEAR/3 function*                                                                                            | 83,129 |
| #53<br>'daily life activity'/exp OR 'daily life activity'                                                                   | 575    |
| #52<br>'get up and go'                                                                                                      | 358    |
| #51<br>'get up and go test*'                                                                                                | 480    |
| #50<br>gug                                                                                                                  | 218    |
| #49<br>tugt                                                                                                                 | 4,340  |
| #48<br>'time* up and go test*'                                                                                              | 6,245  |
| #47<br>'time* up and go'                                                                                                    | 23,453 |
| #46<br>'hand strength'/exp OR 'hand strength'                                                                               | 23,489 |
| #45<br>'grip strength'                                                                                                      | 6,382  |
| #44<br>'gait speed*'                                                                                                        | 13,037 |
| #43<br>'walking speed'/de                                                                                                   | 4,664  |

|     |                                                                                                                                                                                                                                                                  |         |
|-----|------------------------------------------------------------------------------------------------------------------------------------------------------------------------------------------------------------------------------------------------------------------|---------|
| #42 | (edmonton OR fried) NEAR/5<br>(index* OR indicator* OR score* OR scale* OR tool* OR test* OR model* OR phenotype* OR criteri* OR marker* OR method* OR instrument* OR assess* OR exam* OR evaluat*<br>OR measure* OR screen* OR diagnos* OR detect* OR identif*) | 212     |
| #41 | 'phenotype model*'                                                                                                                                                                                                                                               | 161     |
| #40 | 'cumulative deficit*'                                                                                                                                                                                                                                            | 13,564  |
| #39 | sarcop?ni*                                                                                                                                                                                                                                                       | 7,824   |
| #38 | 'sarcopenia'/de                                                                                                                                                                                                                                                  | 67,295  |
| #37 | 'function* status'                                                                                                                                                                                                                                               | 2,147   |
| #36 | 'geriatric syndrome*'                                                                                                                                                                                                                                            | 925     |
| #35 | 'physic* frail*'                                                                                                                                                                                                                                                 | 164     |
| #34 | 'cognitiv* frail*'                                                                                                                                                                                                                                               | 1,112   |
| #33 | 'frail* stat*'                                                                                                                                                                                                                                                   | 36      |
| #32 | 'extreme* frail*'                                                                                                                                                                                                                                                | 247     |
| #31 | 'severe* frail*'                                                                                                                                                                                                                                                 | 103     |
| #30 | 'moderat* frail*'                                                                                                                                                                                                                                                | 81      |
| #29 | 'mild* frail*'                                                                                                                                                                                                                                                   | 222,566 |
| #28 | robust                                                                                                                                                                                                                                                           | 933     |
| #27 | 'pre frail*'                                                                                                                                                                                                                                                     | 189     |
| #25 | 'geriatric psychopharmacology'                                                                                                                                                                                                                                   | 24      |
| #24 | 'geriatric psychology'                                                                                                                                                                                                                                           | 15,897  |
| #23 | 'geriatric psychiatry'                                                                                                                                                                                                                                           |         |

|     |                                      |         |
|-----|--------------------------------------|---------|
| #22 | 'gerontopsychiatry'/de               | 7,419   |
| #21 | frail*                               | 35,672  |
| #20 | 'frailty'/de                         | 6,933   |
| #19 | 'comprehensive geriatric assessment' | 3,388   |
| #18 | retirement                           | 21,529  |
| #17 | 'geriatric assessment'               | 17,002  |
| #16 | 'geriatric assessment'/de            | 14,862  |
| #15 | polypathologic*                      | 122     |
| #14 | 'deep old age'                       | 1       |
| #13 | 'oldest old'                         | 2,966   |
| #12 | retiree*                             | 1,776   |
| #11 | retired                              | 10,138  |
| #10 | 'retirement'/de                      | 14,588  |
| #9  | oap*                                 | 1,086   |
| #8  | pensioner*                           | 2,573   |
| #7  | senior*                              | 69,188  |
| #6  | geriatric*                           | 290,034 |
| #5  | 'geriatrics'/de                      | 44,730  |
| #4  | elderly                              | 508,098 |
| #3  | 'older adult*'                       | 88,963  |

|              |           |
|--------------|-----------|
|              | 21,564    |
| #2           |           |
| 'late* life' | 4,261,046 |

**Anticholinergic domain (searched with OR)**

|                                                                                                                                                                                                                                                                                    |        |
|------------------------------------------------------------------------------------------------------------------------------------------------------------------------------------------------------------------------------------------------------------------------------------|--------|
|                                                                                                                                                                                                                                                                                    | 119    |
| #80                                                                                                                                                                                                                                                                                |        |
| 'anticholinergic drug scale'/exp OR 'anticholinergic drug scale'                                                                                                                                                                                                                   | 55,932 |
| #79                                                                                                                                                                                                                                                                                |        |
| ars                                                                                                                                                                                                                                                                                | 122    |
| #78                                                                                                                                                                                                                                                                                |        |
| 'anticholinergic risk scale'                                                                                                                                                                                                                                                       | 122    |
| #77                                                                                                                                                                                                                                                                                |        |
| 'anticholinergic risk scale'/exp OR 'anticholinergic risk scale'                                                                                                                                                                                                                   | 163    |
| #76                                                                                                                                                                                                                                                                                |        |
| 'drug burden index'/exp OR 'drug burden index'                                                                                                                                                                                                                                     | 5,476  |
| #75                                                                                                                                                                                                                                                                                |        |
| acb                                                                                                                                                                                                                                                                                | 153    |
| #74                                                                                                                                                                                                                                                                                |        |
| 'anticholinergic cognit* burden'                                                                                                                                                                                                                                                   | 1,381  |
| #73                                                                                                                                                                                                                                                                                |        |
| (anti\$choliner* OR anti\$muscarinic*) NEAR/5<br>(burden* OR risk* OR assess* OR scale* OR tool* OR quantif* OR measure* OR rating* OR load* OR accum<br>ulat* OR capacit*)                                                                                                        | 81,931 |
| #72                                                                                                                                                                                                                                                                                |        |
| atropin*                                                                                                                                                                                                                                                                           | 9,085  |
| #71                                                                                                                                                                                                                                                                                |        |
| 'muscarinic receptor block*'                                                                                                                                                                                                                                                       | 1,363  |
| #70                                                                                                                                                                                                                                                                                |        |
| parasympatholytic*                                                                                                                                                                                                                                                                 | 1,230  |
| #69                                                                                                                                                                                                                                                                                |        |
| 'cholinergic antagonist*'                                                                                                                                                                                                                                                          | 1,011  |
| #68                                                                                                                                                                                                                                                                                |        |
| 'anticholinergic syndrome*'                                                                                                                                                                                                                                                        | 4,408  |
| #67                                                                                                                                                                                                                                                                                |        |
| 'muscarinic antagonist*'                                                                                                                                                                                                                                                           | 9,836  |
| #66                                                                                                                                                                                                                                                                                |        |
| 'cholinergic blocking*' OR 'antimuscarinic*' OR 'muscarinic antagonist*' OR 'parasympatholytic*' OR<br>( 'atropinic*' NEAR/5<br>(drug* OR medic* OR agent* OR therap* OR regime* OR treatment* OR preparation* OR remed* OR pill* O<br>R tablet* OR prescri* OR dose* OR dosing*)) |        |

|     |                                                                                                                                                                   |        |
|-----|-------------------------------------------------------------------------------------------------------------------------------------------------------------------|--------|
| #65 | 'cholinergic block*'                                                                                                                                              | 967    |
| #64 | anti\$choliner* NEAR/5<br>(drug* OR medic* OR therap* OR regime* OR treatment* OR preparation* OR remed* OR pill* OR tablet* O<br>R prescri* OR dose* OR dosing*) | 10,336 |
| #63 | anti\$muscarinic*                                                                                                                                                 | 4,075  |
| #62 | anti\$choliner*                                                                                                                                                   | 20,743 |
| #61 | 'cholinergic receptor blocking agent'/de OR 'cholinergic receptor blocking agent'                                                                                 | 30,433 |
| #60 | 'anticholinergic syndrome'/de OR 'anticholinergic syndrome'                                                                                                       | 1,006  |
| #59 | 'muscarinic receptor blocking agent'/de                                                                                                                           | 8,754  |

#### Epidemiological filters domain

|     |                                             |           |
|-----|---------------------------------------------|-----------|
| #96 | 'questionnaire'/de                          | 633,427   |
| #95 | 'cross sectional' NEAR/5 (study OR studies) | 380,229   |
| #94 | 'cross sectional'                           | 484,584   |
| #93 | retrospective                               | 1,097,928 |
| #92 | longitudinal                                | 335,504   |
| #91 | observation* NEAR/5 (study OR studies)      | 286,957   |
| #90 | follow NEAR/5 (study OR studies)            | 229,526   |
| #89 | cohort NEAR/5 (study OR studies)            | 417,579   |
| #88 | 'cohort analy*'                             | 478,475   |
| #87 | 'cohort stud*'                              | 265,450   |

|                                                  |         |
|--------------------------------------------------|---------|
| #86                                              | 213,795 |
| 'case control'                                   |         |
| #85                                              | 477,978 |
| 'cohort analysis'/exp OR 'cohort analysis'       |         |
| #84                                              | 187,495 |
| 'case control study'/exp OR 'case control study' |         |
| #83                                              | 216,014 |
| 'epidemiology'/de                                |         |

The final search comprises of:

**Elderly/frailty domain AND anticholinergic domain AND epidemiological filter domain**

### **Symbols**

(/de) = Emtree term

(\*) = Matches multiple characters.

(\$) = Replaces one or no letters

(?) = Single letter truncation

Near operator (N): **NEAR/5** finds the words if they are a maximum of five words apart from one another, regardless of the order in which they appear.

## The Cochrane Database of Systematic Reviews

### Elderly/frailty domain (searched with OR)

| ID  | Search                                                 | Hits   |
|-----|--------------------------------------------------------|--------|
| #1  | MeSH descriptor: [Aged] explode all trees              | 1236   |
| #2  | "late* life"                                           | 33     |
| #3  | MeSH descriptor: [Age Factors] explode all trees       | 9860   |
| #4  | "older adult*"                                         | 759    |
| #5  | elderly                                                | 47287  |
| #6  | MeSH descriptor: [Geriatrics] this term only           | 198    |
| #7  | geriatric*                                             | 14275  |
| #8  | senior*                                                | 4396   |
| #9  | pensioner*                                             | 72     |
| #10 | oap*                                                   | 67     |
| #11 | MeSH descriptor: [Retirement] this term only           | 49     |
| #12 | retired                                                | 477    |
| #13 | retiree*                                               | 89     |
| #14 | "oldest old*"                                          | 93     |
| #15 | "deep old age"                                         | 0      |
| #16 | polypathologic*                                        | 8      |
| #17 | MeSH descriptor: [Geriatric Assessment] this term only | 1412   |
| #18 | "geriatric assessment"                                 | 1957   |
| #19 | retirement                                             | 455    |
| #20 | aged                                                   | 475124 |
| #21 | "comprehensive geriatric assessment"                   | 306    |
| #22 | MeSH descriptor: [Frailty] this term only              | 31     |
| #23 | frail*                                                 | 3193   |
| #24 | MeSH descriptor: [Geriatric Psychiatry] this term only | 39     |
| #25 | "geriatric psychiatry"                                 | 1502   |
| #26 | "geriatric psychology"                                 | 3      |
| #27 | "geriatric psychopharmacology"                         | 54     |
| #29 | "pre-frail*"                                           | 130    |
| #30 | robust                                                 | 10458  |
| #31 | "mild frailty"                                         | 2      |



|     |                                                                                                                                                                                                                                                                |       |
|-----|----------------------------------------------------------------------------------------------------------------------------------------------------------------------------------------------------------------------------------------------------------------|-------|
| #32 | "moderate frailty"                                                                                                                                                                                                                                             | 3     |
| #33 | "severe frailty"                                                                                                                                                                                                                                               | 6     |
| #34 | "extreme frailty"                                                                                                                                                                                                                                              | 1     |
| #35 | "frailty status"                                                                                                                                                                                                                                               | 104   |
| #36 | "cognitive frailty"                                                                                                                                                                                                                                            | 9     |
| #37 | "physical frailty"                                                                                                                                                                                                                                             | 92    |
| #38 | "geriatric syndrome*"                                                                                                                                                                                                                                          | 53    |
| #39 | "function* status"                                                                                                                                                                                                                                             | 113   |
| #40 | MeSH descriptor: [Sarcopenia] this term only                                                                                                                                                                                                                   | 312   |
| #41 | sarcop?ni*                                                                                                                                                                                                                                                     | 1143  |
| #42 | "cumulative deficit*"                                                                                                                                                                                                                                          | 6     |
| #43 | "phenotype model*"                                                                                                                                                                                                                                             | 8     |
| #44 | ("edmonton" or "fried") NEAR/5 (index* or indicator* or score* or scale* or tool* or test* or model* or phenotype* or criteri* or marker* or method* or instrument* or assess* or exam* or evaluat* or measure* or screen* or diagnos* or detect* or identif*) | 353   |
| #45 | MeSH descriptor: [Walking Speed] this term only                                                                                                                                                                                                                | 80    |
| #46 | "gait speed*"                                                                                                                                                                                                                                                  | 1331  |
| #47 | "grip strength"                                                                                                                                                                                                                                                | 3631  |
| #48 | MeSH descriptor: [Hand Strength] explode all trees                                                                                                                                                                                                             | 1311  |
| #49 | "time* up and go"                                                                                                                                                                                                                                              | 176   |
| #50 | "time* up and go test*"                                                                                                                                                                                                                                        | 104   |
| #51 | tugt                                                                                                                                                                                                                                                           | 78    |
| #52 | gug                                                                                                                                                                                                                                                            | 7     |
| #53 | "get up and go test*"                                                                                                                                                                                                                                          | 135   |
| #54 | "get up and go"                                                                                                                                                                                                                                                | 187   |
| #55 | MeSH descriptor: [Activities of Daily Living] explode all trees                                                                                                                                                                                                | 8760  |
| #56 | physical NEAR/3 function*                                                                                                                                                                                                                                      | 11690 |
| #57 | multi-morbid*                                                                                                                                                                                                                                                  | 415   |
| #58 | "advanced age*"                                                                                                                                                                                                                                                | 901   |
| #59 | multi-disease*                                                                                                                                                                                                                                                 | 21    |

#60 (multidisease\* or multidisease\* or (multiple NEAR/1 (ill\* or disease# or condition\* or syndrome\* or disorder\*)))

1251

#61 #1 OR #2 OR #3 OR #4 OR #5 OR #6 OR #7 OR #8 OR #9 OR #10 OR #11 OR #12 OR #13 OR #14 OR #15 OR #16 OR #17 OR #18 OR #19 OR #20 OR #21 OR #22 OR #23 OR #24 OR #25 OR #26 OR #27 OR #28 OR #29 OR #30 OR #31 OR #32 OR #33 OR #34 OR #35 OR #36 OR #37 OR #38 OR #39 OR #40 OR #41 OR #42 OR #43 OR #44 OR #45 OR #46 OR #47 OR #48 OR #49 OR #50 OR #51 OR #52 OR #53 OR #54 OR #55 OR #56 OR #57 OR #58 OR #59 OR #60

521408

### Anticholinergic domain (searched with OR)

#62 MeSH descriptor: [Muscarinic Antagonists] this term only 850

#63 MeSH descriptor: [Anticholinergic Syndrome] this term only 1

#64 MeSH descriptor: [Cholinergic Antagonists] explode all trees 1220

#65 anti?choliner\* 3509

#66 anti?muscarinic\* 761

#67 (anti?choliner\*) NEAR/5 (drug\* or medic\* or therap\* or regime\* or treatment\* or preparation\* or remed\* or pill\* or tablet\* or prescri\* or dose\* or dosing\*) 1737

#68 "cholinergic block\*" 0

#69 ("cholinergic blocking\*" or anti?muscarinic\* or "muscarinic antagonist\*" or parasympatholytic\* or atropinic\*) NEAR/5 (drug\* or medic\* or agent\* or therap\* or regime\* or treatment\* or preparation\* or remed\* or pill\* or tablet\* or prescri\* or dose\* or dosing\*)

1046

#70 "muscarinic antagonist\*" 590

#71 "anticholinergic syndrome\*" 31

#72 "cholinergic antagonist\*" 49

#73 parasympatholytic\* 821

#74 "muscarinic receptor block\*" 0

#75 atropin\* 3498

#76 (anti?choliner\* or anti?muscarinic\*) NEAR/5 (burden\* or risk\* or assess\* or scale\* or tool\* or quantif\* or measure\* or rating\* or load\* or accumul\* or capacit\*)

241

#77 "anticholinergic cognitive burden" 6

#78 acb 563

#79 "drug burden index" 21

#80 "anticholinergic risk scale" 5

#81 ars 674

#82 "anticholinergic drug scale\*" 10

|     |                                                                                                                                                               |       |
|-----|---------------------------------------------------------------------------------------------------------------------------------------------------------------|-------|
| #83 | ads                                                                                                                                                           | 625   |
| #84 | Sedative NEAR/1 (load or burden or accumulat*)                                                                                                                | 4     |
| #85 | #62 OR #63 OR #64 OR #65 OR #66 OR #67 OR #68 OR #69 OR #70 OR #71 OR #72 OR #73 OR #74 OR #75 OR #76 OR #77 OR #78 OR #79 OR #80 OR #81 OR #82 OR #83 OR #84 | 10727 |

#### **Epidemiological filters domain (searched with OR)**

|      |                                                            |        |
|------|------------------------------------------------------------|--------|
| #86  | MeSH descriptor: [Epidemiologic Studies] this term only    | 40     |
| #87  | MeSH descriptor: [Case-Control Studies] explode all trees  | 12803  |
| #88  | MeSH descriptor: [Cohort Studies] explode all trees        | 142437 |
| #89  | "case control"                                             | 11344  |
| #90  | "cohort study"                                             | 10664  |
| #91  | "cohort analysis*"                                         | 16749  |
| #92  | cohort NEAR/5 (study or studies)                           | 28214  |
| #93  | follow NEAR/5 (study or studies)                           | 99954  |
| #94  | observation* NEAR/5 (study or studies)                     | 21125  |
| #95  | longitudinal                                               | 19596  |
| #96  | retrospective                                              | 30177  |
| #97  | "cross sectional"                                          | 16162  |
| #98  | "cross sectional" NEAR/5 (study or studies)                | 11914  |
| #99  | survey                                                     | 28935  |
| #100 | MeSH descriptor: [Epidemiologic Studies] explode all trees | 148834 |

|      |                                                                                                        |        |
|------|--------------------------------------------------------------------------------------------------------|--------|
| #101 | #86 OR #87 OR #88 OR #89 OR #90 OR #91 OR #92 OR #93 OR #94 OR #95 OR #96 OR #97 OR #98 OR #99 OR #100 | 277398 |
|------|--------------------------------------------------------------------------------------------------------|--------|

#### **Final search of all three domains (searched with AND)**

|      |                                       |      |
|------|---------------------------------------|------|
| #102 | #61 AND #85 AND #101                  | 1258 |
|      | After only including Cochrane reviews | 275  |

#### **Symbols**

MeSH = Exact subject heading.

(\*) = One or more characters

(?) = Zero or one characters

Near operator (NEAR/x): **NEAR/5** finds the words if they are a maximum of five words apart from one another, regardless of the order in which they appear.

## Web of Science

### Rows combined with “OR” and columns combined with “AND”

All terms were searched in “ALL FIELDS” unless stated otherwise.

The search was conducted in the Core Collection

| <u>Elderly/frailty domain</u> | <u>Anticholinergic domain</u>                                                                                                                                                                                                                                                                    | <u>Epidemiological filters domain</u>                 |
|-------------------------------|--------------------------------------------------------------------------------------------------------------------------------------------------------------------------------------------------------------------------------------------------------------------------------------------------|-------------------------------------------------------|
| Aged                          | “Muscarinic Antagonists”                                                                                                                                                                                                                                                                         | "Epidemiologic Studies"                               |
| “late* life”                  | "Anticholinergic Syndrome"                                                                                                                                                                                                                                                                       | "Case-Control Studies"                                |
| “Age Factors”                 | "Cholinergic Antagonists”                                                                                                                                                                                                                                                                        | "Cohort Studies”                                      |
| “older adult*”                | anticholiner*                                                                                                                                                                                                                                                                                    | “case control”                                        |
| elderly                       | antimuscarinic*                                                                                                                                                                                                                                                                                  | “cohort stud*”                                        |
| geriatric*                    | TOPIC: (anticholiner*) NEAR/5<br>(drug* or medic* or therap* or<br>regime* or treatment* or<br>preparation* or remed* or pill* or<br>tablet* or prescri* or dose* or<br>dosing*)                                                                                                                 | “cohort analy*”                                       |
| senior*                       | “cholinergic block*”                                                                                                                                                                                                                                                                             | TOPIC: cohort NEAR/5 (study or<br>studies)            |
| pensioner*                    | TOPIC: (“cholinergic blocking*”<br>or antimuscarinic* or “muscarinic<br>antagonist*” or<br>parasympatholytic* or atropinic*)<br>NEAR/5 (drug* or medic* or<br>agent* or therap* or regime* or<br>treatment* or preparation* or<br>remed* or pill* or tablet* or<br>prescri* or dose* or dosing*) | TOPIC: follow NEAR/5 (study or<br>studies)            |
| oap*                          | “muscarinic antagonist*”                                                                                                                                                                                                                                                                         | TOPIC: observation* NEAR/5<br>(study or studies)      |
| Retirement                    | “anticholinergic syndrome*”                                                                                                                                                                                                                                                                      | longitudinal                                          |
| retired                       | “cholinergic antagonist*”                                                                                                                                                                                                                                                                        | retrospective                                         |
| retiree*                      | parasympatholytic*                                                                                                                                                                                                                                                                               | “cross sectional”                                     |
| “oldest old”                  | “muscarinic receptor block*”                                                                                                                                                                                                                                                                     | TOPIC: “cross sectional” NEAR/5<br>(study or studies) |
| “deep old age”                | atropin*                                                                                                                                                                                                                                                                                         | survey                                                |
| polypathologic*               | TOPIC: (anticholiner* or<br>antimuscarinic*) NEAR/5<br>(burden* or risk* or assess* or<br>scale* or tool* or quantif* or<br>measure* or rating* or load* or<br>accumulat* or capacit*)                                                                                                           |                                                       |

|                                                                                                                                                                                                                                                                   |                                                       |  |
|-------------------------------------------------------------------------------------------------------------------------------------------------------------------------------------------------------------------------------------------------------------------|-------------------------------------------------------|--|
| "Geriatric Assessment"                                                                                                                                                                                                                                            | "anticholinergic cognit* burden"                      |  |
| "comprehensive geriatric assessment"                                                                                                                                                                                                                              | acb                                                   |  |
| Frailty"                                                                                                                                                                                                                                                          | "drug burden index"                                   |  |
| frail*                                                                                                                                                                                                                                                            | "anticholinergic risk scale"                          |  |
| "Geriatric Psychiatry"                                                                                                                                                                                                                                            | ars                                                   |  |
| "geriatric psychology"                                                                                                                                                                                                                                            | "anticholinergic drug scale*"                         |  |
| "geriatric psychopharmacology"                                                                                                                                                                                                                                    | ads                                                   |  |
| old*                                                                                                                                                                                                                                                              | TOPIC: Sedative NEAR/1 (load or burden or accumulat*) |  |
| "pre-frail*"                                                                                                                                                                                                                                                      |                                                       |  |
| robust                                                                                                                                                                                                                                                            |                                                       |  |
| "mild* frail*"                                                                                                                                                                                                                                                    |                                                       |  |
| "moderat* frail*"                                                                                                                                                                                                                                                 |                                                       |  |
| "severe* frail*"                                                                                                                                                                                                                                                  |                                                       |  |
| "extreme* frail*"                                                                                                                                                                                                                                                 |                                                       |  |
| "frail* stat*"                                                                                                                                                                                                                                                    |                                                       |  |
| "cognitiv* frail*"                                                                                                                                                                                                                                                |                                                       |  |
| "physic* frail*"                                                                                                                                                                                                                                                  |                                                       |  |
| "geriatric syndrome*"                                                                                                                                                                                                                                             |                                                       |  |
| "function* status"                                                                                                                                                                                                                                                |                                                       |  |
| Sarcopenia                                                                                                                                                                                                                                                        |                                                       |  |
| Sarcop?ni*                                                                                                                                                                                                                                                        |                                                       |  |
| "cumulative deficit*"                                                                                                                                                                                                                                             |                                                       |  |
| "phenotype model*"                                                                                                                                                                                                                                                |                                                       |  |
| TOPIC: (edmonton or fried) NEAR/5 (index* or indicator* or score* or scale* or tool* or test* or model* or phenotype* or criteri* or marker* or method* or instrument* or assess* or exam* or evaluat* or measure* or screen* or diagnos* or detect* or identif*) |                                                       |  |

|                                                                                                                                   |  |  |
|-----------------------------------------------------------------------------------------------------------------------------------|--|--|
| "Walking Speed"                                                                                                                   |  |  |
| "gait speed*"                                                                                                                     |  |  |
| "grip strength"                                                                                                                   |  |  |
| "Hand Strength"                                                                                                                   |  |  |
| "time* up and go"                                                                                                                 |  |  |
| "time* up and go test*"                                                                                                           |  |  |
| tugt                                                                                                                              |  |  |
| gug                                                                                                                               |  |  |
| "get up and go test*"                                                                                                             |  |  |
| "get up and go"                                                                                                                   |  |  |
| "Activities of Daily Living"                                                                                                      |  |  |
| TOPIC: physical NEAR/3<br>function*                                                                                               |  |  |
| "multi-morbid*"                                                                                                                   |  |  |
| "advanced age*"                                                                                                                   |  |  |
| "multi-disease*"                                                                                                                  |  |  |
| TOPIC: (multidisease* or multi-<br>disease* or (multiple NEAR/1<br>(ill* or disease or condition* or<br>syndrome* or disorder*))) |  |  |

**Symbols:**

(\*) = Matches multiple characters.

(?) = Single letter truncation

Near operator (NEAR/): **NEAR/5** finds the words if they are a maximum of five words apart from one another, regardless of the order in which they appear.

PsycINFO (EBSCO)

Rows combined with “OR” and columns combined with “AND”

| <u>Elderly/frailty domain</u> | <u>Anticholinergic domain</u>                                                                                                                                                                                                                              | <u>Epidemiological filters domain</u>   |
|-------------------------------|------------------------------------------------------------------------------------------------------------------------------------------------------------------------------------------------------------------------------------------------------------|-----------------------------------------|
| Aged                          | “Muscarinic Antagonists”                                                                                                                                                                                                                                   | (DE "Epidemiology")                     |
| “late* life”                  | "Anticholinergic Syndrome"                                                                                                                                                                                                                                 | “epidemiologic studies”                 |
| "Age Factors”                 | "Cholinergic Antagonistss=”                                                                                                                                                                                                                                | "case-control studies"                  |
| “older adult*”                | anti#choliner*                                                                                                                                                                                                                                             | (DE "Cohort Analysis")                  |
| elderly                       | anti#muscarinic*                                                                                                                                                                                                                                           | case control                            |
| (DE "Geriatrics")             | (anti#choliner*) N5 (drug* or medic* or therap* or regime* or treatment* or preparation* or remed* or pill* or tablet* or prescri* or dose* or dosing*)                                                                                                    | cohort stud*                            |
| geriatric*                    | “cholinergic block*”                                                                                                                                                                                                                                       | cohort analy*                           |
| senior*                       | (cholinergic blocking* or anti#muscarinic* or muscarinic antagonist* or parasympatholytic* or atropinic*) N5 (drug* or medic* or agent* or therap* or regime* or treatment* or preparation* or remed* or pill* or tablet* or prescri* or dose* or dosing*) | cohort N5 (study or studies)            |
| pensioner*                    | “muscarinic antagonist*”                                                                                                                                                                                                                                   | follow N5 (study or studies)            |
| oap*                          | “anticholinergic syndrome*”                                                                                                                                                                                                                                | observation* N5 (study or studies)      |
| (DE "Retirement")             | “cholinergic antagonist*”                                                                                                                                                                                                                                  | longitudinal                            |
| retired                       | parasympatholytic*                                                                                                                                                                                                                                         | retrospective                           |
| retiree*                      | “muscarinic receptor block*”                                                                                                                                                                                                                               | “cross sectional”                       |
| “oldest old”                  | atropin*                                                                                                                                                                                                                                                   | “cross sectional” N5 (study or studies) |
| “deep old age”                | (anti#choliner* or anti#muscarinic*) N5 (burden* or risk* or assess* or scale* or tool* or quantif* or measure* or rating* or load* or accumulat* or capacit*)                                                                                             | survey                                  |
| polypathologic*               | “anti#cholinergic cognit* burden”                                                                                                                                                                                                                          |                                         |
| (DE "Geriatric Assessment")   | acb                                                                                                                                                                                                                                                        |                                         |
| “geriatric assessment”        | “drug burden index”                                                                                                                                                                                                                                        |                                         |

|                                                                                                                                                                                                |                                            |  |
|------------------------------------------------------------------------------------------------------------------------------------------------------------------------------------------------|--------------------------------------------|--|
| retirement                                                                                                                                                                                     | “anticholinergic risk scale”               |  |
| “comprehensive geriatric assessment”                                                                                                                                                           | ars                                        |  |
| Frailty                                                                                                                                                                                        | “anticholinergic drug scale**”             |  |
| frail*                                                                                                                                                                                         | ads                                        |  |
| (DE "Geriatric Psychiatry")                                                                                                                                                                    | Sedative N1 (load or burden or accumulat*) |  |
| (DE "Geropsychology")                                                                                                                                                                          |                                            |  |
| “geriatric psychology”                                                                                                                                                                         |                                            |  |
| “geriatric psychopharmacology”                                                                                                                                                                 |                                            |  |
| “pre-frail**”                                                                                                                                                                                  |                                            |  |
| robust                                                                                                                                                                                         |                                            |  |
| “mild* frail**”                                                                                                                                                                                |                                            |  |
| “moderat* frail**”                                                                                                                                                                             |                                            |  |
| “severe* frail**”                                                                                                                                                                              |                                            |  |
| “extreme* frail**”                                                                                                                                                                             |                                            |  |
| “frail* stat**”                                                                                                                                                                                |                                            |  |
| “cognitiv* frail**”                                                                                                                                                                            |                                            |  |
| “physic* frail**”                                                                                                                                                                              |                                            |  |
| “geriatric syndrome**”                                                                                                                                                                         |                                            |  |
| (DE "Functional Status")                                                                                                                                                                       |                                            |  |
| Sarcopenia                                                                                                                                                                                     |                                            |  |
| sarcop#eni*                                                                                                                                                                                    |                                            |  |
| “cumulative deficit**”                                                                                                                                                                         |                                            |  |
| “phenotype model**”                                                                                                                                                                            |                                            |  |
| (edmonton or fried) N5 (index* or indicator* or score* or scale* or tool* or test* or model* or phenotype* or criteri* or marker* or method* or instrument* or assess* or exam* or evaluat* or |                                            |  |



|                                                                                                                        |  |  |
|------------------------------------------------------------------------------------------------------------------------|--|--|
| measure* or screen* or diagnos*<br>or detect* or identif*)                                                             |  |  |
| “Walking Speed”                                                                                                        |  |  |
| “gait speed*”                                                                                                          |  |  |
| “grip strength”                                                                                                        |  |  |
| “Hand Strength”                                                                                                        |  |  |
| “time* up and go”                                                                                                      |  |  |
| “time* up and go test*”                                                                                                |  |  |
| tugt                                                                                                                   |  |  |
| gug                                                                                                                    |  |  |
| “get up and go test*”                                                                                                  |  |  |
| “get up and go”                                                                                                        |  |  |
| (DE "Activities of Daily Living")                                                                                      |  |  |
| physical N3 function*                                                                                                  |  |  |
| “multi-morbid*”                                                                                                        |  |  |
| “advanced age*”                                                                                                        |  |  |
| “multi-disease*”                                                                                                       |  |  |
| (multidisease* or multi-disease*<br>or (multiple N1 (ill* or disease# or<br>condition* or syndrome* or<br>disorder*))) |  |  |
|                                                                                                                        |  |  |

**Symbols:**

DE = Subjects [exact].

(\*) = Replaces one or more letters

(#) = Matches one optional character.

Near operator (N): **N5** finds the words if they are a maximum of five words apart from one another, regardless of the order in which they appear.

### Appendix 3: Screening flowchart for title/abstracts and full-texts

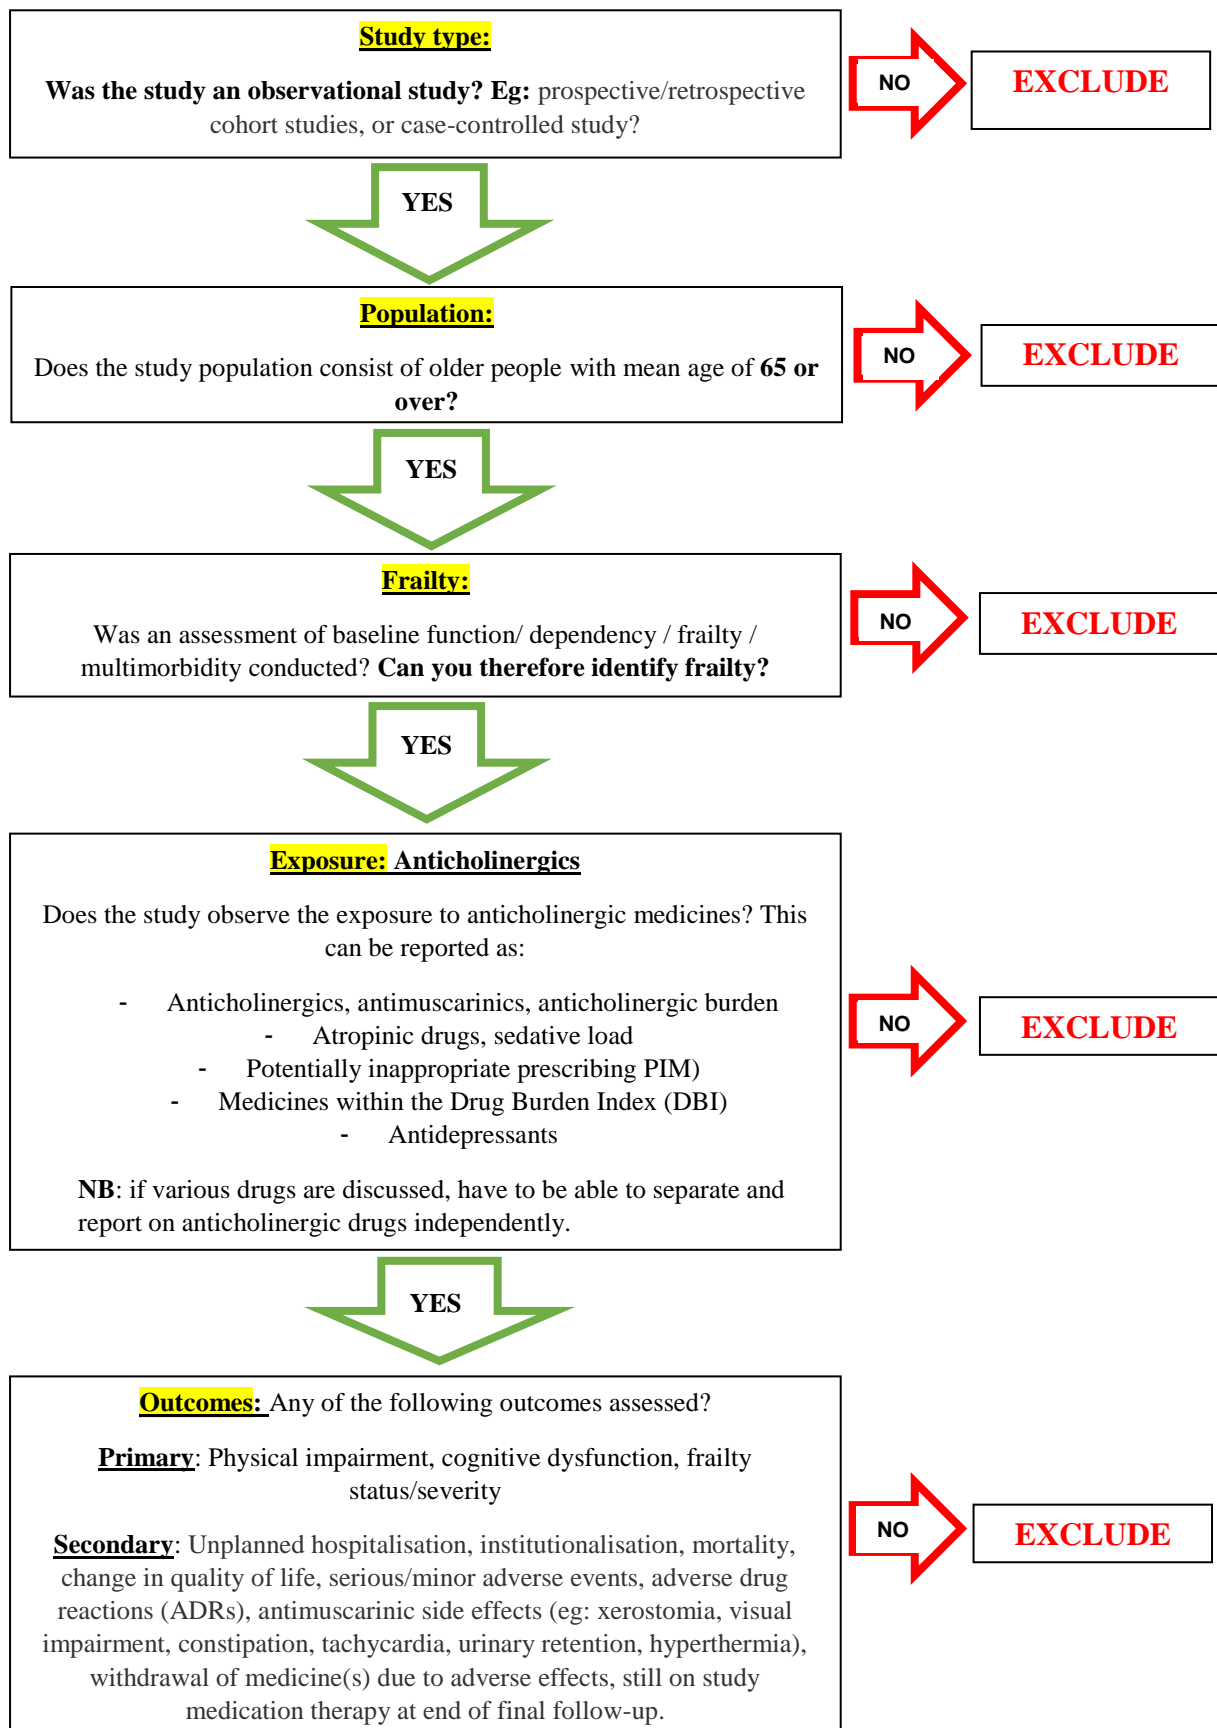

#### Appendix 4: Reaching judgement of overall risk of bias using the ROBINS-I tool

| Response Option                                                                                                                                                                 | Criteria                                                                                                                                                                                                     |
|---------------------------------------------------------------------------------------------------------------------------------------------------------------------------------|--------------------------------------------------------------------------------------------------------------------------------------------------------------------------------------------------------------|
| <u>Low risk of bias</u> (the study is comparable to a well-performed randomized trial);                                                                                         | The study is judged to be at <b>low risk of bias for all domains.</b>                                                                                                                                        |
| <u>Moderate risk of bias</u> (the study appears to provide sound evidence for a non-randomized study but cannot be considered comparable to a well-performed randomized trial); | The study is judged to be at <b>low or moderate risk of bias for all domains.</b>                                                                                                                            |
| <u>Serious risk of bias</u> (the study has some important problems);                                                                                                            | The study is judged to be at <b>serious risk of bias</b> in at least one domain, but not at critical risk of bias in any domain.                                                                             |
| <u>Critical risk of bias</u> (the study is too problematic to provide any useful evidence and should not be included in any synthesis);                                         | The study is judged to be at <b>critical risk of bias in at least one domain.</b>                                                                                                                            |
| <u>No information</u> on which to base a judgement about risk of bias.                                                                                                          | There is no clear indication that the study is at serious or critical risk of bias <i>and</i> there is a lack of information in one or more key domains of bias ( <i>a judgement is required for this</i> ). |

## Appendix 5: Summary of reasons for excluding studies at full-text review stage

| Study first author (year)      | Study title                                                                                                                                                                                    | Reason for exclusion                                                                                                            |
|--------------------------------|------------------------------------------------------------------------------------------------------------------------------------------------------------------------------------------------|---------------------------------------------------------------------------------------------------------------------------------|
| <b>Aizenburg, (2002) [1]</b>   | Anticholinergic Burden and the Risk of Falls Among Elderly Psychiatric Inpatients: A 4-Year Case-Control Study                                                                                 | No validated measure of frailty.                                                                                                |
| <b>Ancelin, (2006) [2]</b>     | Non-degenerative mild cognitive impairment in elderly people and use of anticholinergic drugs: longitudinal cohort study                                                                       | No validated measure of frailty.                                                                                                |
| <b>Andre, (2019) [3]</b>       | Anticholinergic exposure and cognitive decline in older adults: effect of anticholinergic exposure definitions in a 3-year analysis of the multidomain Alzheimer preventive trial (MAPT) study | Frailty reported, however outcomes stratified by frailty not reported.                                                          |
| <b>Ball, (2015) [4]</b>        | Anticholinergic Burden Assessed using General Practice Electronic records                                                                                                                      | No validated measure of frailty.                                                                                                |
| <b>Berdot, (2009) [5]</b>      | Inappropriate medication use and risk of falls – A prospective study in a large community-dwelling elderly cohort                                                                              | No validated measure of frailty.                                                                                                |
| <b>Bostock, (2013) [6]</b>     | Associations between different measures of anticholinergic drug exposure and Barthel Index in older hospitalized patients                                                                      | No validated measure of frailty.                                                                                                |
| <b>Bottiggi, (2006) [7]</b>    | Long-Term Cognitive Impact of Anticholinergic Medications in Older Adults                                                                                                                      | No validated measure of frailty.                                                                                                |
| <b>Byrne, (2019) [8]</b>       | Impact of drug burden index on adverse health outcomes in Irish community-dwelling older people: a cohort study                                                                                | Frailty reported as an outcome, but unable to identify whether there is a change in frailty state associated with the exposure. |
| <b>Campbell, (2011) [9]</b>    | Association Between Prescribing of Anticholinergic Medications and Incident Delirium: A Cohort Study                                                                                           | No validated measure of frailty.                                                                                                |
| <b>Cancelli, (2010) [10]</b>   | Anticholinergic drugs increase the risk of cognitive decline and dementia in older people                                                                                                      | No validated measure of frailty.                                                                                                |
| <b>Chatterjee, (2017) [11]</b> | Risk of Mortality Associated with Anticholinergic Use in Elderly Nursing Home Residents with Depression                                                                                        | No validated measure of frailty.                                                                                                |
| <b>Esin, (2015) [12]</b>       | Influence of antimuscarinic therapy on cognitive functions and quality of life in geriatric patients treated for overactive bladder                                                            | No validated measure of frailty.                                                                                                |
| <b>George, (2017) [13]</b>     | Polypharmacy and Gait Performance in Community-dwelling Older Adults                                                                                                                           | Unable to isolate anticholinergics from the exposure variable.                                                                  |
| <b>Giron, (2001) [14]</b>      | The appropriateness of drug use in older nondemented and demented population                                                                                                                   | No validated measure of frailty.                                                                                                |
| <b>Gnjidic, (2009) [15]</b>    | Drug Burden Index and physical function in older Australian men                                                                                                                                | No evidence of a pre-frail/frail sample.                                                                                        |

|                             |                                                                                                                                                                                                            |                                                                                                                                 |
|-----------------------------|------------------------------------------------------------------------------------------------------------------------------------------------------------------------------------------------------------|---------------------------------------------------------------------------------------------------------------------------------|
| <b>Gnjidic, (2014) [16]</b> | Sedative load and functional outcomes in community-dwelling older Australian men: the CHAMP study                                                                                                          | No evidence of a pre-frail/frail sample.                                                                                        |
| <b>Gnjidic, (2012) [17]</b> | High-Risk Prescribing and Incidence of Frailty among Older community-Dwelling Men                                                                                                                          | Frailty reported as an outcome, but unable to identify whether there is a change in frailty state associated with the exposure. |
| <b>Han, (2008) [18]</b>     | Cumulative Anticholinergic Exposure Is Associated with Poor Memory and Executive Function in Older Men                                                                                                     | No validated measure of frailty.                                                                                                |
| <b>Hassan, (2018) [19]</b>  | Associations between Drug Burden Index, medication appropriateness and patient-reported outcomes in the community pharmacy setting in Malaysia                                                             | Frailty reported, however outcomes stratified by frailty not reported.                                                          |
| <b>Herr (2017) [20]</b>     | Frailty, polypharmacy, and potentially inappropriate medications in old people: findings in a representative sample of the French population                                                               | Frailty reported as an outcome, but unable to identify whether there is a change in frailty state associated with the exposure. |
| <b>Hilmer (2009) [21]</b>   | Drug Burden Index Score and Functional Decline in Older People                                                                                                                                             | No evidence of a pre-frail/frail sample.                                                                                        |
| <b>Huang (2012) [22]</b>    | Relationship between Potentially Inappropriate Anticholinergic Drugs (PIADs) and Adverse Outcomes among Elderly Patients in Taiwan                                                                         | No validated measure of frailty.                                                                                                |
| <b>Inkeri, (2019) [23]</b>  | Anticholinergic drug use and its association with self-reported symptoms among older persons with and without diabetes                                                                                     | No validated measure of frailty.                                                                                                |
| <b>Jamsen, (2017) [24]</b>  | Drug Burden Index and change in cognition over time in community-dwelling older men: the CHAMP study                                                                                                       | No validated measure of frailty.                                                                                                |
| <b>Kersten, (2015) [25]</b> | Clinical impact of potentially inappropriate medications during hospitalization of acutely ill older patients with multimorbidity                                                                          | Unable to isolate anticholinergics from the exposure variable. (Unable to contact corresponding author to request this data)    |
| <b>Khan, (2013) [26]</b>    | Clinical Decision Support System and Incidence of Delirium in Cognitively Impaired Older Adults Transferred to Intensive Care                                                                              | No validated measure of frailty.                                                                                                |
| <b>Koyama, (2014) [27]</b>  | Long-term Cognitive and Functional Effects of Potentially Inappropriate Medications in Older Women                                                                                                         | No validated measure of frailty.                                                                                                |
| <b>Kroger, (2019) [28]</b>  | Is the Drug Burden Index Related to Declining Functional Status at Follow-up in Community-Dwelling Seniors Consulting for Minor Injuries? Results from the Canadian Emergency Team Initiative Cohort Study | Unable to isolate anticholinergics from the exposure variable. (Unable to contact corresponding author to request this data)    |
| <b>Lampela, (2013) [29]</b> | Anticholinergic Drug Use, Serum Anticholinergic Activity, and Adverse Drug Events Among Older People: A Population-Based Study                                                                             | No validated measure of frailty.                                                                                                |
| <b>Lampela, (2016) [30]</b> | Association Between Anticholinergic Load and Frailty in Community-dwelling Older People                                                                                                                    | Frailty reported as an outcome, but unable to identify whether there is a change in frailty state associated with the exposure. |
| <b>Landi, (2014) [31]</b>   | Anticholinergic Drug Use and Negative Outcomes Among the Frail Elderly Population Living in a Nursing Home                                                                                                 | No validated measure of frailty.                                                                                                |

|                                |                                                                                                                                                                                                          |                                                                                                                                 |
|--------------------------------|----------------------------------------------------------------------------------------------------------------------------------------------------------------------------------------------------------|---------------------------------------------------------------------------------------------------------------------------------|
| <b>Lowry, (2011) [32]</b>      | Associations Between the Anticholinergic Risk Scale Score and Physical Function: Potential Implications for Adverse Outcomes in Older Hospitalized Patients                                              | No validated measure of frailty.                                                                                                |
| <b>MacLagan, (2017) [33]</b>   | Frailty and Potentially Inappropriate Medication Use at Nursing Home Transition                                                                                                                          | No reporting of clinical outcomes.                                                                                              |
| <b>Merchant, (2009) [34]</b>   | Use of drugs with anticholinergic effects and cognitive impairment in community-living older persons                                                                                                     | No validated measure of frailty.                                                                                                |
| <b>Moulis, (2015) [35]</b>     | Exposure to Atropinic Drugs and Frailty Status                                                                                                                                                           | Frailty reported as an outcome, but unable to identify whether there is a change in frailty state associated with the exposure. |
| <b>Movig, (2001) [36]</b>      | Association Between Oxybutynin and Neuropsychiatric Adverse Effects Not Confirmed In Daily Practice                                                                                                      | No validated measure of frailty.                                                                                                |
| <b>Myint, (2015) [37]</b>      | Total anticholinergic burden and risk of mortality and cardiovascular disease over 10 years in 21,636 middle-aged and older men and women of EPIC-Norfolk prospective population study                   | No validated measure of frailty.                                                                                                |
| <b>O'Connell, (2018) [38]</b>  | Drug burden index to define the burden of medicines in older adults with intellectual disabilities: An observational cross-sectional study                                                               | No validated measure of frailty.                                                                                                |
| <b>O'Connell, (2019) [39]</b>  | Association of Drug Burden Index with grip strength, timed up and go and Barthel index activities of daily living in older adults with intellectual disabilities: an observational cross-sectional study | Inappropriate population.                                                                                                       |
| <b>Oken, (2006) [40]</b>       | Cognition and fatigue in multiple sclerosis: Potential effects of medications with central nervous system activity                                                                                       | No validated measure of frailty.                                                                                                |
| <b>Pasina, (2013) [41]</b>     | Association of Anticholinergic Burden with Cognitive and Functional Status in a Cohort of Hospitalized Elderly: Comparison of the Anticholinergic Cognitive Burden Scale and Anticholinergic Risk Scale  | No validated measure of frailty.                                                                                                |
| <b>Peklar, (2015) [42]</b>     | Sedative Load and Frailty Among Community-Dwelling Population Aged 65 Years                                                                                                                              | Frailty reported as an outcome, but unable to identify whether there is a change in frailty state associated with the exposure. |
| <b>Petrov, (2014) [43]</b>     | Benzodiazepine (BZD) use in community-dwelling older adults: Longitudinal associations with mobility, functioning, and pain                                                                              | No validated measure of frailty.                                                                                                |
| <b>Risacher, (2016) [44]</b>   | Association Between Anticholinergic Medication Use and Cognition, Brain Metabolism, and Brain Atrophy in Cognitively Normal Older Adults                                                                 | No validated measure of frailty.                                                                                                |
| <b>Salahudeen, (2015) [45]</b> | Anticholinergic burden quantified by anticholinergic risk scales and adverse outcomes in older people: a systematic review                                                                               | Inappropriate study design.                                                                                                     |

|                                       |                                                                                                                                                                        |                                                                                                                                 |
|---------------------------------------|------------------------------------------------------------------------------------------------------------------------------------------------------------------------|---------------------------------------------------------------------------------------------------------------------------------|
| <b>Salahudeen, (2015) [46]</b>        | Comparison of Anticholinergic Risk Scales and Associations with Adverse Health Outcomes in Older People                                                                | No validated measure of frailty.                                                                                                |
| <b>Sanders, (2017) [47]</b>           | Relationship between drug burden and physical and cognitive functions in a sample of nursing home patients with dementia                                               | No evidence of a pre-frail/frail sample. (Unable to contact corresponding author to request further)                            |
| <b>Sargent, (2018) [48]</b>           | Anticholinergic Drug Induced Cognitive and Physical Impairment: Results from the InCHIANTI Study                                                                       | Frailty reported as an outcome, but unable to identify whether there is a change in frailty state associated with the exposure. |
| <b>Seifert, (1983) [49]</b>           | Use of anticholinergics in the nursing home: an empirical study and review                                                                                             | Unable to obtain full text.                                                                                                     |
| <b>Shapiro (2017) [50]</b>            | Medication Use Leading to Hospital Readmission in Frail Elders                                                                                                         | No validated measure of frailty.                                                                                                |
| <b>Sharma, (2018) [51]</b>            | Predictors of Falls and Fractures Leading to Hospitalization in People with Dementia: A Representative Cohort Study                                                    | No validated measure of frailty.                                                                                                |
| <b>Sura, (2015) [52]</b>              | Anticholinergic drugs and health-related quality of life in older adults with dementia                                                                                 | No validated measure of frailty.                                                                                                |
| <b>Taipale, (2011) [53]</b>           | Muscle Strength and Sedative Load in Community- Dwelling People Aged 75 Years and Older: A Population- Based Study                                                     | Unable to isolate anticholinergics from the exposure variable.                                                                  |
| <b>Teramura-Grönblad, (2011) [54]</b> | Use of Anticholinergic Drugs and Cholinesterase Inhibitors and Their Association with Psychological Well-Being Among Frail Older Adults in Residential Care Facilities | No validated measure of frailty.                                                                                                |
| <b>Uusvaara, (2013) [55]</b>          | Detailed Cognitive Function and Use of Drugs with Anticholinergic Properties in Older People                                                                           | No validated measure of frailty.                                                                                                |
| <b>Villalba-Moreno, (2018) [56]</b>   | Association Between Drug Burden Index and Functional and Cognitive Function in Patients with Multimorbidity                                                            | No validated measure of frailty.                                                                                                |
| <b>Wauters, (2016) [57]</b>           | Polypharmacy in a Belgian cohort of community- dwelling oldest old (80+)                                                                                               | No validated measure of frailty.                                                                                                |
| <b>Wouters, (2017) [58]</b>           | Quantification of anticholinergic and sedative drug load with the Drug Burden Index: a review of outcomes and methodological quality of studies                        | Inappropriate study design.                                                                                                     |
| <b>Wouters, (2019) [59]</b>           | Long-Term Exposure to Anticholinergic and Sedative Medications and Cognitive and Physical Function in Later Life                                                       | No evidence of a pre-frail/frail sample.                                                                                        |
| <b>Wu, (2017) [60]</b>                | Association between using medications with anticholinergic properties and short-term cognitive decline among older men: A retrospective cohort study in Taiwan         | Frailty reported as an outcome, but unable to identify whether there is a change in frailty state associated with the exposure. |
| <b>Yalya, (2015) [61]</b>             | Drugs with anticholinergic side-effects in primary care                                                                                                                | Very few participants in the study exposed to anticholinergic medicines.                                                        |

## Appendix 6: Results of the meta-analysis

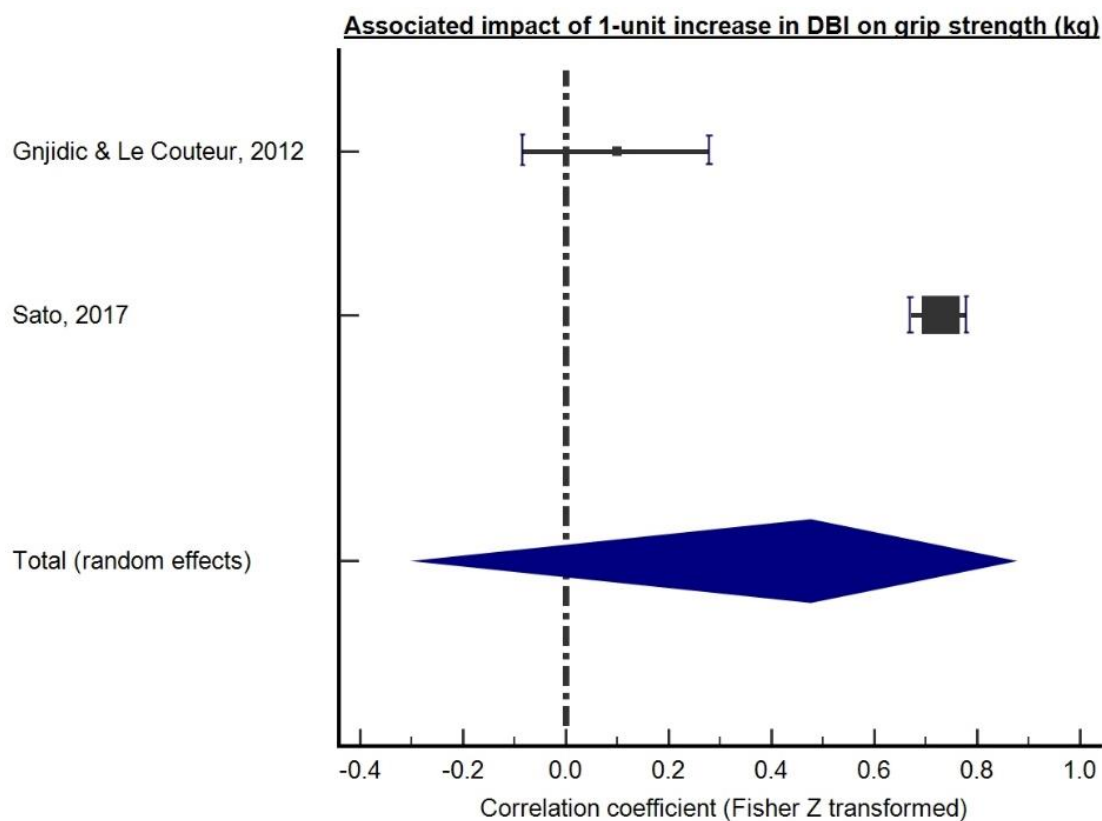

| Study                      | Sample size | Correlation coefficient | 95% CI           | z      | P      | Weight (%) |        |
|----------------------------|-------------|-------------------------|------------------|--------|--------|------------|--------|
|                            |             |                         |                  |        |        | Fixed      | Random |
| Gnjjidic, Le Couteur, 2012 | 115         | 0.100                   | -0.0847 to 0.278 |        |        | 26.99      | 49.59  |
| Sato, 2017                 | 306         | 0.730                   | 0.673 to 0.778   |        |        | 73.01      | 50.41  |
| Total (fixed effects)      | 421         | 0.608                   | 0.543 to 0.665   | 14.365 | <0.001 | 100.00     | 100.00 |
| Total (random effects)     | 421         | 0.476                   | -0.286 to 0.869  | 1.250  | 0.211  | 100.00     | 100.00 |

|                                |                |
|--------------------------------|----------------|
| Q                              | 56.1157        |
| DF                             | 1              |
| Significance level             | P < 0.0001     |
| I <sup>2</sup> (inconsistency) | 98.22%         |
| 95% CI for I <sup>2</sup>      | 95.94 to 99.22 |

A forest plot reporting standardised pooled estimates of the change in grip strength (kg) with a one-unit increase in Drug Burden Index (DBI) score. Random effects modelling was adopted as the I<sup>2</sup> value was ≥ 50%.



## References

1. Aizenberg D, Sigler M, Weizman A, Barak Y. Anticholinergic burden and the risk of falls among elderly psychiatric inpatients: a 4-year case-control study. *International psychogeriatrics*. 2002;14(3):307-10. doi:10.1017/s1041610202008505.
2. Ancelin ML, Artero S, Portet F, Dupuy A-M, Touchon J, Ritchie K. Non-degenerative mild cognitive impairment in elderly people and use of anticholinergic drugs: longitudinal cohort study. *BMJ*. 2006;332(7539):455. doi:10.1136/bmj.38740.439664.DE.
3. Andre L, Gallini A, Montastruc F, Coley N, Montastruc JL, Vellas B et al. Anticholinergic exposure and cognitive decline in older adults: effect of anticholinergic exposure definitions in a 3-year analysis of the multidomain Alzheimer preventive trial (MAPT) study. *British journal of clinical pharmacology*. 2019;85(1):71-99. doi:10.1111/bcp.13734.
4. Ball PA, Morrissey H, Pilotto LSJ. Anticholinergic Burden Assessed Using General Practice Electronic Records. *Journal of Pharmacy Practice and Research*. 2013;43(3):202-5. doi:<https://doi.org/10.1002/j.2055-2335.2013.tb00255.x>.
5. Berdot S, Bertrand M, Dartigues J-F, Fourrier A, Tavernier B, Ritchie K et al. Inappropriate medication use and risk of falls--a prospective study in a large community-dwelling elderly cohort. *BMC Geriatr*. 2009;9:30-. doi:10.1186/1471-2318-9-30.
6. Bostock CV, Soiza RL, Mangoni AA. Associations between different measures of anticholinergic drug exposure and Barthel Index in older hospitalized patients. *Therapeutic advances in drug safety*. 2013;4(6):235-45. doi:10.1177/2042098613500689.
7. Bottiggi KA, Salazar JC, Yu L, Caban-Holt AM, Ryan M, Mendiondo MS et al. Long-term cognitive impact of anticholinergic medications in older adults. *The American journal of geriatric psychiatry : official journal of the American Association for Geriatric Psychiatry*. 2006;14(11):980-4. doi:10.1097/01.jgp.0000224619.87681.71.
8. Byrne C, Walsh C, Cahir C, Bennett K. Impact of drug burden index on adverse health outcomes in Irish community-dwelling older people: A cohort study. *BMC Geriatr*. 2019;19. doi:10.1186/s12877-019-1138-7.
9. Campbell N, Perkins A, Hui S, Khan B, Boustani M. Association between prescribing of anticholinergic medications and incident delirium: a cohort study. *Journal of the American Geriatrics Society*. 2011;59 Suppl 2(Suppl 2):S277-81. doi:10.1111/j.1532-5415.2011.03676.x.
10. Cancelli I. Anticholinergic drugs increase the risk of cognitive decline and dementia in older people. *Evidence-based mental health*. 2010;13(2):44. doi:10.1136/ebmh.13.2.44.
11. Chatterjee S, Bali V, Carnahan RM, Chen H, Johnson ML, Aparasu RR. Risk of Mortality Associated with Anticholinergic Use in Elderly Nursing Home Residents with Depression. *Drugs & Aging*. 2017;34(9):691-700. doi:10.1007/s40266-017-0475-5.
12. Esin E, Ergen A, Cankurtaran M, Yavuz BB, Halil M, Ulger Z et al. Influence of antimuscarinic therapy on cognitive functions and quality of life in geriatric patients treated for overactive bladder. *Aging & mental health*. 2015;19(3):217-23. doi:10.1080/13607863.2014.922528.
13. George C, Verghese J. Polypharmacy and Gait Performance in Community-dwelling Older Adults. *Journal of the American Geriatrics Society*. 2017;65(9):2082-7. doi:10.1111/jgs.14957.
14. Giron MS, Wang HX, Bernsten C, Thorslund M, Winblad B, Fastbom J. The appropriateness of drug use in an older nondemented and demented population. *Journal of the American Geriatrics Society*. 2001;49(3):277-83. doi:10.1046/j.1532-5415.2001.4930277.x.
15. Gnjidic D, Cumming RG, Le Couteur DG, Handelsman DJ, Naganathan V, Abernethy DR et al. Drug Burden Index and physical function in older Australian men. *British journal of clinical pharmacology*. 2009;68(1):97-105. doi:10.1111/j.1365-2125.2009.03411.x.
16. Gnjidic D, Le Couteur DG, Hilmer SN, Cumming RG, Blyth FM, Naganathan V et al. Sedative load and functional outcomes in community-dwelling older Australian men: the CHAMP study. *Fundamental & clinical pharmacology*. 2014;28(1):10-9. doi:10.1111/j.1472-8206.2012.01063.x.
17. Gnjidic D, Hilmer SN, Blyth FM, Naganathan V, Cumming RG, Handelsman DJ et al. High-risk prescribing and incidence of frailty among older community-dwelling men. *Clinical pharmacology and therapeutics*. 2012;91(3):521-8. doi:10.1038/clpt.2011.258.
18. Han L, Agostini JV, Allore HG. Cumulative anticholinergic exposure is associated with poor memory and executive function in older men. *Journal of the American Geriatrics Society*. 2008;56(12):2203-10. doi:10.1111/j.1532-5415.2008.02009.x.
19. Hasan SS, Liew ASC, Chong DWK, Thiruchelvam K, Babar Z-U-D. Associations between Drug Burden Index, medication appropriateness and patient-reported outcomes in the community pharmacy setting in Malaysia. *Drugs & Therapy Perspectives*. 2018;34(9):437-43. doi:10.1007/s40267-018-0521-3.

20. Herr M, Sirven N, Grondin H, Pichetti S, Sermet C. Frailty, polypharmacy, and potentially inappropriate medications in old people: findings in a representative sample of the French population. *European journal of clinical pharmacology*. 2017;73(9):1165-72. doi:10.1007/s00228-017-2276-5.
21. Hilmer SN, Mager DE, Simonsick EM, Ling SM, Windham BG, Harris TB et al. Drug burden index score and functional decline in older people. *The American journal of medicine*. 2009;122(12):1142-9.e1-2. doi:10.1016/j.amjmed.2009.02.021.
22. Huang KH, Chan YF, Shih HC, Lee CY. Relationship between Potentially Inappropriate Anticholinergic Drugs (PIADs) and Adverse Outcomes among Elderly Patients in Taiwan. *Journal of Food and Drug Analysis*. 2012;20:930-7+85. doi:10.6227/jfda.2012200423.
23. Inkeri NM, Karjalainen M, Haanpää M, Kautiainen H, Saltevo J, Mäntyselkä P et al. Anticholinergic drug use and its association with self-reported symptoms among older persons with and without diabetes. *Journal of clinical pharmacy and therapeutics*. 2019;44(2):229-35. doi:10.1111/jcpt.12772.
24. Jansen KM, Gnjdic D, Hilmer SN, Ilomäki J, Le Couteur DG, Blyth FM et al. Drug Burden Index and change in cognition over time in community-dwelling older men: the CHAMP study. *Annals of medicine*. 2017;49(2):157-64. doi:10.1080/07853890.2016.1252053.
25. Kersten H, Hvidsten LT, Gløersen G, Wyller TB, Wang-Hansen MS. Clinical impact of potentially inappropriate medications during hospitalization of acutely ill older patients with multimorbidity. *Scandinavian journal of primary health care*. 2015;33(4):243-51. doi:10.3109/02813432.2015.1084766.
26. Khan BA, Calvo-Ayala E, Campbell N, Perkins A, Ionescu R, Tricker J et al. Clinical decision support system and incidence of delirium in cognitively impaired older adults transferred to intensive care. *American journal of critical care : an official publication, American Association of Critical-Care Nurses*. 2013;22(3):257-62. doi:10.4037/ajcc2013447.
27. Koyama A, Steinman M, Ensrud K, Hillier TA, Yaffe K. Long-term cognitive and functional effects of potentially inappropriate medications in older women. *The journals of gerontology Series A, Biological sciences and medical sciences*. 2014;69(4):423-9. doi:10.1093/gerona/glt192.
28. Kröger E, Simard M, Sirois MJ, Giroux M, Sirois C, Kouladjian-O'Donnell L et al. Is the Drug Burden Index Related to Declining Functional Status at Follow-up in Community-Dwelling Seniors Consulting for Minor Injuries? Results from the Canadian Emergency Team Initiative Cohort Study. *Drugs Aging*. 2019;36(1):73-83. doi:10.1007/s40266-018-0604-9.
29. Lampela P, Lavikainen P, Garcia-Horsman JA, Bell JS, Huupponen R, Hartikainen S. Anticholinergic drug use, serum anticholinergic activity, and adverse drug events among older people: a population-based study. *Drugs Aging*. 2013;30(5):321-30. doi:10.1007/s40266-013-0063-2.
30. Lampela P, Taipale H, Hartikainen S. Association Between Anticholinergic Load and Frailty in Community-Dwelling Older People. *Journal of the American Geriatrics Society*. 2016;64(3):671-2. doi:10.1111/jgs.13988.
31. Landi F, Dell'Aquila G, Collamati A, Martone AM, Zuliani G, Gasperini B et al. Anticholinergic Drug Use and Negative Outcomes Among the Frail Elderly Population Living in a Nursing Home. *Journal of the American Medical Directors Association*. 2014;15(11):825-9. doi:10.1016/j.jamda.2014.08.002.
32. Lowry E, Woodman RJ, Soiza RL, Mangoni AA. Associations between the anticholinergic risk scale score and physical function: potential implications for adverse outcomes in older hospitalized patients. *J Am Med Dir Assoc*. 2011;12(8):565-72. doi:10.1016/j.jamda.2011.03.006.
33. Maclagan LC, Maxwell CJ, Gandhi S, Guan J, Bell CM, Hogan DB et al. Frailty and Potentially Inappropriate Medication Use at Nursing Home Transition. *Journal of the American Geriatrics Society*. 2017;65(10):2205-12. doi:10.1111/jgs.15016.
34. Merchant RA, Li B, Yap KB, Ng TP. Use of drugs with anticholinergic effects and cognitive impairment in community-living older persons. *Age and ageing*. 2009;38(1):105-8. doi:10.1093/ageing/afn240.
35. Moulis F, Moulis G, Balardy L, Gérard S, Montastruc F, Sourdet S et al. Exposure to Atropinic Drugs and Frailty Status. *Journal of the American Medical Directors Association*. 2015;16(3):253-7. doi:<https://doi.org/10.1016/j.jamda.2014.11.017>.
36. Movig KL, Egberts AC, Lenderink AW, Leufkens HG. Association between oxybutynin and neuropsychiatric adverse effects not confirmed in daily practice. *Journal of the American Geriatrics Society*. 2001;49(2):234-5. doi:10.1046/j.1532-5415.2001.04949.x.
37. Myint PK, Fox C, Kwok CS, Luben RN, Wareham NJ, Khaw KT. Total anticholinergic burden and risk of mortality and cardiovascular disease over 10 years in 21,636 middle-aged and older men and women of EPIC-Norfolk prospective population study. *Age and ageing*. 2015;44(2):219-25. doi:10.1093/ageing/afu185.
38. O'Connell J, Burke É, Mulryan N, O'Dwyer C, Donegan C, McCallion P et al. Drug burden index to define the burden of medicines in older adults with intellectual disabilities: An observational cross-sectional study. *British journal of clinical pharmacology*. 2018;84(3):553-67. doi:10.1111/bcp.13479.
39. O'Connell J, Henman MC, Burke É, Donegan C, McCallion P, McCarron M et al. Association of Drug Burden Index with grip strength, timed up and go and Barthel index activities of daily living in older adults with

- intellectual disabilities: an observational cross-sectional study. *BMC Geriatr.* 2019;19(1):173. doi:10.1186/s12877-019-1190-3.
40. Oken BS, Flegal K, Zajdel D, Kishiyama SS, Lovera J, Bagert B et al. Cognition and fatigue in multiple sclerosis: Potential effects of medications with central nervous system activity. *Journal of rehabilitation research and development.* 2006;43(1):83-90. doi:10.1682/jrrd.2004.11.0148.
41. Pasina L, Djade CD, Lucca U, Nobili A, Tettamanti M, Franchi C et al. Association of anticholinergic burden with cognitive and functional status in a cohort of hospitalized elderly: comparison of the anticholinergic cognitive burden scale and anticholinergic risk scale: results from the REPOSI study. *Drugs Aging.* 2013;30(2):103-12. doi:10.1007/s40266-012-0044-x.
42. Peklar J, O'Halloran AM, Maidment ID, Henman MC, Kenny RA, Kos M. Sedative load and frailty among community-dwelling population aged  $\geq 65$  years. *J Am Med Dir Assoc.* 2015;16(4):282-9. doi:10.1016/j.jamda.2014.10.010.
43. Petrov ME, Sawyer P, Kennedy R, Bradley LA, Allman RM. Benzodiazepine (BZD) use in community-dwelling older adults: Longitudinal associations with mobility, functioning, and pain. *Archives of gerontology and geriatrics.* 2014;59(2):331-7. doi:10.1016/j.archger.2014.04.017.
44. Risacher SL, McDonald BC, Tallman EF, West JD, Farlow MR, Unverzagt FW et al. Association Between Anticholinergic Medication Use and Cognition, Brain Metabolism, and Brain Atrophy in Cognitively Normal Older Adults. *JAMA neurology.* 2016;73(6):721-32. doi:10.1001/jamaneurol.2016.0580.
45. Salahudeen MS, Duffull SB, Nishtala PS. Anticholinergic burden quantified by anticholinergic risk scales and adverse outcomes in older people: a systematic review. *BMC Geriatr.* 2015;15(1):31. doi:10.1186/s12877-015-0029-9.
46. Salahudeen MS, Hilmer SN, Nishtala PS. Comparison of anticholinergic risk scales and associations with adverse health outcomes in older people. *Journal of the American Geriatrics Society.* 2015;63(1):85-90. doi:10.1111/jgs.13206.
47. Sanders LMJ, Hortobágyi T, van Staveren G, Taxis K, Boersma F, Klein HC et al. Relationship between drug burden and physical and cognitive functions in a sample of nursing home patients with dementia. *European journal of clinical pharmacology.* 2017;73(12):1633-42. doi:10.1007/s00228-017-2319-y.
48. Sargent L, Nalls M, Amella EJ, Mueller M, Lageman SK, Bandinelli S et al. Anticholinergic Drug Induced Cognitive and Physical Impairment: Results from the InCHIANTI Study. *The journals of gerontology Series A, Biological sciences and medical sciences.* 2020;75(5):995-1002. doi:10.1093/gerona/gly289.
49. Seifert R, Jamieson J, Gardner R, Jr. Use of anticholinergics in the nursing home: an empirical study and review. *Drug intelligence & clinical pharmacy.* 1983;17(6):470-3. doi:10.1177/106002808301700618.
50. Shapiro JS, McCoy RG, Takahashi PY, Thorsteinsdottir B, Peterson SM, Naessens JM et al. Medication Use Leading to Hospital Readmission in Frail Elders. *The Journal for Nurse Practitioners.* 2017;13(10):708-15. doi:<https://doi.org/10.1016/j.nurpra.2017.08.015>.
51. Sharma S, Mueller C, Stewart R, Veronese N, Vancampfort D, Koyanagi A et al. Predictors of Falls and Fractures Leading to Hospitalization in People With Dementia: A Representative Cohort Study. *J Am Med Dir Assoc.* 2018;19(7):607-12. doi:10.1016/j.jamda.2018.03.009.
52. Sura SD, Carnahan RM, Chen H, Aparasu RR. Anticholinergic drugs and health-related quality of life in older adults with dementia. *Journal of the American Pharmacists Association : JAPhA.* 2015;55(3):282-7. doi:10.1331/JAPhA.2015.14068.
53. Taipale HT, Bell JS, Gnjdic D, Sulkava R, Hartikainen S. Muscle strength and sedative load in community-dwelling people aged 75 years and older: a population-based study. *The journals of gerontology Series A, Biological sciences and medical sciences.* 2011;66(12):1384-92. doi:10.1093/gerona/glr170.
54. Teramura-Grönblad M, Muurinen S, Soini H, Suominen M, Pitkälä KH. Use of anticholinergic drugs and cholinesterase inhibitors and their association with psychological well-being among frail older adults in residential care facilities. *The Annals of pharmacotherapy.* 2011;45(5):596-602. doi:10.1345/aph.1P650.
55. Uusvaara J, Pitkala KH, Kautiainen H, Tilvis RS, Strandberg TE. Detailed cognitive function and use of drugs with anticholinergic properties in older people: a community-based cross-sectional study. *Drugs Aging.* 2013;30(3):177-82. doi:10.1007/s40266-013-0055-2.
56. Villalba-Moreno AM, Alfaro-Lara ER, Rodríguez-Pérez A, Báñez-Toro D, Sánchez-Fidalgo S, Pérez-Guerrero MC et al. Association Between Drug Burden Index and Functional and Cognitive Function in Patients with Multimorbidity. *Current pharmaceutical design.* 2018;24(28):3384-91. doi:10.2174/1381612824666180327154239.
57. Wauters M, Elseviers M, Vaes B, Degryse J, Dalleur O, Vander Stichele R et al. Polypharmacy in a Belgian cohort of community-dwelling oldest old (80+). *Acta clinica Belgica.* 2016;71(3):158-66. doi:10.1080/17843286.2016.1148298.
58. Wouters H, van der Meer H, Taxis K. Quantification of anticholinergic and sedative drug load with the Drug Burden Index: a review of outcomes and methodological quality of studies. *European journal of clinical pharmacology.* 2017;73(3):257-66. doi:10.1007/s00228-016-2162-6.

59. Wouters H, Hilmer SN, Gnjjidic D, Van Campen JP, Teichert M, Van Der Meer HG et al. Long-Term Exposure to Anticholinergic and Sedative Medications and Cognitive and Physical Function in Later Life. *The journals of gerontology Series A, Biological sciences and medical sciences*. 2020;75(2):357-65. doi:10.1093/gerona/glz019.
60. Wu YH, Wang CJ, Hung CH, Chen LY, Lin MH, Wang PN et al. Association between using medications with anticholinergic properties and short-term cognitive decline among older men: A retrospective cohort study in Taiwan. *Geriatrics & gerontology international*. 2017;17 Suppl 1:57-64. doi:10.1111/ggi.13032.
61. Yayla EM, Yavuz E, Bilge U, Keskin A, Binen E. Drugs with anticholinergic side-effects in primary care. *Nigerian journal of clinical practice*. 2015;18(1):18-21. doi:10.4103/1119-3077.146969.
